# Supplementary material for: Milk Intake in Early Life and Later Cancer Risk: A Meta-Analysis
Source: MDPI journal article supplement (doi:10.3390/nu14061233), 2022-03-15

**List of supplementary materials:**

1. Supplementary Table S1: MOOSE Checklist
2. Supplementary Table S2: Database Search Strategy
3. Supplementary Table S3: Characteristics of Studies Included
4. Supplementary Table S4: Meta-analyses of dairy intake in early life with any breast cancer risk
5. Supplementary Table S5: Meta-analyses of dairy intake in early life with any prostate cancer risk
6. Supplementary Table S6: Meta-analysis of dairy intake in early life with any colorectal cancer risk
7. Supplementary Figure S1: Funnel plot for the meta-analysis of milk intake during early life with any breast cancer risk
8. Supplementary Figure S2: Contour-enhanced funnel plot for the meta-analysis of milk intake during early life with any breast cancer risk, applying the trim-and-fill method

**Supplementary Table S1. MOOSE Checklist**

| Criteria                                           |                                                                               | Brief description of how the criteria were handled in the meta-analysis                                                                     |
|----------------------------------------------------|-------------------------------------------------------------------------------|---------------------------------------------------------------------------------------------------------------------------------------------|
| <b>Reporting of background should include</b>      |                                                                               |                                                                                                                                             |
| √                                                  | Problem definition                                                            | Reported on page No. 1-2                                                                                                                    |
| √                                                  | Hypothesis statement                                                          | Reported on page No. 1-2                                                                                                                    |
| √                                                  | Description of study outcomes                                                 | Breast, prostate, colorectal cancer risk later in life                                                                                      |
| √                                                  | Type of exposure or intervention used                                         | Milk intake in childhood and adolescence                                                                                                    |
| √                                                  | Type of study designs used                                                    | We included observational studies.                                                                                                          |
| √                                                  | Study population                                                              | We placed no restriction.                                                                                                                   |
| <b>Reporting of search strategy should include</b> |                                                                               |                                                                                                                                             |
| √                                                  | Qualifications of searchers                                                   | The credentials of the investigators were indicated in the author list.                                                                     |
| √                                                  | Search strategy, including time period included in the synthesis and keywords | Search was done to include studies published through December 2021.<br><br>Detailed search strategy was provided in Supplementary Table S1. |
| √                                                  | Databases and registries searched                                             | PubMed and Embase                                                                                                                           |
| √                                                  | Search software used, name and version, including special features            | We did not employ a search software.<br><br>EndNote was used to merge retrieved articles and eliminate duplications.                        |
| √                                                  | Use of hand searching                                                         | The reference lists of all the articles included in this analysis were also reviewed for additional studies.                                |
| √                                                  | List of citations located and those excluded, including justifications        | Details of the literature search process are outlined in Figure1.                                                                           |
| √                                                  | Method of addressing articles published in languages other than English       | We restricted the language to English.                                                                                                      |

|                                               |                                                                                                                                            |                                                                                                                                |
|-----------------------------------------------|--------------------------------------------------------------------------------------------------------------------------------------------|--------------------------------------------------------------------------------------------------------------------------------|
| √                                             | Method of handling abstracts and unpublished studies                                                                                       | We excluded abstracts and unpublished results.                                                                                 |
| √                                             | Description of any contact with authors                                                                                                    | No author contact was made for this manuscript.                                                                                |
| <b>Reporting of methods should include</b>    |                                                                                                                                            |                                                                                                                                |
| √                                             | Description of relevance or appropriateness of studies assembled for assessing the hypothesis to be tested                                 | Reported on page No. 2-4                                                                                                       |
| √                                             | Rationale for the selection and coding of data                                                                                             | Reported on page No. 2-3                                                                                                       |
| √                                             | Assessment of confounding                                                                                                                  | We extracted the most appropriate adjusted RRs.                                                                                |
| √                                             | Assessment of study quality, including blinding of quality assessors; stratification or regression on possible predictors of study results | Subgroup analyses by menopausal status, cancer stage, fat content of milk, life stage of milk, or study design were conducted. |
| √                                             | Assessment of heterogeneity                                                                                                                | Heterogeneity was quantified by $I^2$ .                                                                                        |
| √                                             | Description of statistical methods in sufficient detail to be replicated                                                                   | Reported on page No. 3-4                                                                                                       |
| √                                             | Provision of appropriate tables and graphics                                                                                               | We included 12 figures (flow chart, forest plots). Additional table and figures were also provided in supplementary materials. |
| <b>Reporting of results should include</b>    |                                                                                                                                            |                                                                                                                                |
| √                                             | Graph summarizing individual study estimates and overall estimate                                                                          | Figure 2-4                                                                                                                     |
| √                                             | Table giving descriptive information for each study included                                                                               | Supplementary table S2                                                                                                         |
| √                                             | Results of sensitivity testing                                                                                                             | Supplementary table S4-6                                                                                                       |
| √                                             | Indication of statistical uncertainty of findings                                                                                          | 95% confidence intervals were presented for all summary estimates.                                                             |
| <b>Reporting of discussion should include</b> |                                                                                                                                            |                                                                                                                                |

|                                                |                                                                |                                                                                                                                                                   |
|------------------------------------------------|----------------------------------------------------------------|-------------------------------------------------------------------------------------------------------------------------------------------------------------------|
| √                                              | Quantitative assessment of bias                                | Publication bias was tested via Egger's test.                                                                                                                     |
| √                                              | Justification for exclusion                                    | Reported on page No. 2-3<br><br>Non-human studies or articles that do not provide required data for meta-analysis were excluded.                                  |
| √                                              | Assessment of quality of included studies                      | Subgroup analyses were conducted by menopausal status, cancer stage, fat content of milk, life stage of milk, or study design, but the results were inconsistent. |
| <b>Reporting of conclusions should include</b> |                                                                |                                                                                                                                                                   |
| √                                              | Consideration of alternative explanations for observed results | Reported on page No. 10-12                                                                                                                                        |
| √                                              | Generalization of the conclusions                              | Reported on page No. 12                                                                                                                                           |
| √                                              | Guidelines for future research                                 | Reported on page No. 12                                                                                                                                           |
| √                                              | Disclosure of funding source                                   | Reported on page No. 12                                                                                                                                           |

**Supplementary Table S2. Database Search Strategy**

|               |                                                                                                                                                                                                                                                                                                                                                                                                                                                                                                                            |
|---------------|----------------------------------------------------------------------------------------------------------------------------------------------------------------------------------------------------------------------------------------------------------------------------------------------------------------------------------------------------------------------------------------------------------------------------------------------------------------------------------------------------------------------------|
| <b>PubMed</b> | (Dairy Products[Mesh] OR Dairy[tw] OR milk[tw] OR yogurt[tw] OR cheese[tw]) AND (child[Mesh] OR adolescent[tw] OR adolescence[tw] OR early[tw] OR childhood[tw] OR teens[tw] OR preschool[tw]) AND ("Neoplasms"[Mesh] OR neoplasm[tw] OR neoplasms[tw] OR neoplasia[tw] OR carcinoma[tw] OR carcinomas[tw] OR cancer[tw] OR cancers[tw] OR tumor[tw] OR tumors[tw] OR tumour[tw] OR tumours[tw]) NOT (Case Reports[ptyp] OR Comment[ptyp] OR Letter[ptyp] OR Editorial[ptyp]) NOT (animals[Mesh] NOT humans[Mesh])         |
| <b>Embase</b> | ('Dairy Product'/exp OR Dairy:ti,ab OR milk:ti,ab OR yogurt:ti,ab OR cheese:ti,ab) AND (adolescent:ti,ab OR adolescence:ti,ab OR early:ti,ab OR childhood:ti,ab OR teens:ti,ab) AND ('malignant neoplasm'/exp OR neoplasm:ti,ab OR neoplasms:ti,ab OR neoplasia:ti,ab OR carcinoma:ti,ab OR carcinomas:ti,ab OR cancer:ti,ab OR cancers:ti,ab OR tumor:ti,ab OR tumors:ti,ab OR tumour:ti,ab OR tumours:ti,ab) NOT ('case report'/de OR 'editorial'/de OR 'letter'/de OR 'review'/de) NOT ([animals]/lim NOT [humans]/lim) |

**Supplementary Table S3. Characteristics of Studies Included**

| First author,<br>Year,<br>Country, | Cohort name,<br>study design                                       | Sex,<br>Age at baseline | Age of<br>milk intake | RR for highest vs.<br>lowest milk intake<br>(95%CI) |
|------------------------------------|--------------------------------------------------------------------|-------------------------|-----------------------|-----------------------------------------------------|
| <b>Any Breast Cancer</b>           |                                                                    |                         |                       |                                                     |
| Haraldsdottir,<br>2018,<br>Iceland | Age Gene Environment<br>Susceptibility(AGES),<br>Prospective study | F,<br>76.5yrs           | 14-19                 | 0.70 (0.40, 1.10)                                   |
| Linós,<br>2010,<br>USA             | Nurses' Health Study II,<br>Prospective study                      | F,<br>34-53yrs          | High school           | 0.98 (0.71, 1.34)                                   |
| Knight,<br>2007,<br>Canada         | NA,<br>Retrospective study                                         | F,<br>20-69yrs          | 10-19                 | 0.62 (0.45, 0.86)                                   |
| Pols,<br>2007,<br>UK               | Boyd Orr cohort,<br>Prospective study                              | F,<br>8yrs              | 4-11                  | 0.83 (0.41, 1.69)                                   |
| Frazier,<br>2003,<br>USA           | Nurses' Health Study I,<br>Retrospective study                     | F,<br>40-65yrs          | High school           | 1.01 (0.95, 1.07)                                   |
| Hjartaker,<br>2001,<br>Norway      | Norwegian Women and Cancer Study<br>(NOWAC),<br>Prospective study  | F,<br>40.7yrs           | Child                 | 0.64 (0.22, 1.87)                                   |
| Shu,<br>2001,<br>China             | The Shanghai Breast Cancer Study,<br>Retrospective study           | F,<br>25-64yrs          | 13-15                 | 0.76 (0.59, 0.98)                                   |
| <b>Any Prostate Cancer</b>         |                                                                    |                         |                       |                                                     |
| Lan,<br>2020,<br>USA               | NIH-AARP Diet and Health Study,<br>Prospective study               | M,<br>50-71yrs          | 12-13                 | 1.06 (0.99, 1.14)                                   |
| Torfadottir,<br>2011,<br>Iceland   | Age Gene Environment<br>Susceptibility(AGES),<br>Prospective study | M,<br>32-60yrs          | 14-19                 | 1.38 (0.85, 2.25)                                   |
| Pols,<br>2007,<br>UK               | Boyd Orr cohort,<br>Prospective study                              | M,<br>8yrs              | 4-11                  | 0.41 (0.16, 1.05)                                   |
| Andersson,<br>1995,<br>Sweden      | NA,<br>Retrospective study                                         | M,<br>64-76             | Adolescence           | 0.80 (0.50, 1.40)                                   |
| <b>Any Colorectal Cancer</b>       |                                                                    |                         |                       |                                                     |
| Cox,<br>2011,<br>New Zealand       | NA,<br>Retrospective study                                         | M/F (51.0)<br>30-69yrs  | 5-18                  | 0.39 (0.20, 0.77)                                   |
| Ruder,<br>2011,<br>USA             | NIH-AARP Diet and Health Study.<br>Prospective study               | M/F (58.5)<br>50-71yrs  | 12-13                 | 0.84 (0.71, 0.99)                                   |

| <b>First author,<br/>Year,<br/>Country,</b> | <b>Cohort name,<br/>study design</b>    | <b>Sex (% men),<br/>Age at baseline</b> | <b>Age of<br/>milk intake</b> | <b>RR for highest vs.<br/>lowest milk intake<br/>(95%CI)</b> |
|---------------------------------------------|-----------------------------------------|-----------------------------------------|-------------------------------|--------------------------------------------------------------|
| Pols,<br>2007,<br>UK                        | Boyd Orr cohort,<br>Retrospective study | M/F (49.4)<br>8yrs                      | 4-11                          | 2.45 (1.11, 5.41)                                            |

Abbreviations: F, Female; M, Male; yrs, years.

**Supplementary Table S4. Meta-analyses of dairy intake in early life with any breast cancer risk**

|                                | No. of studies | RR (95% CI)       | I <sup>2</sup> (%) |
|--------------------------------|----------------|-------------------|--------------------|
| <b>Overall</b>                 | 8              | 0.90 (0.78, 1.03) | 56                 |
| <b>By menopausal status</b>    |                |                   |                    |
| Premenopausal women            | 4              | 0.99 (0.85, 1.16) | 0                  |
| Postmenopausal women           | 3              | 1.00 (0.82, 1.23) | 25                 |
| <b>By cancer stage</b>         |                |                   |                    |
| Invasive breast cancer         | 2              | 0.83 (0.48, 1.43) | 88                 |
| Any breast cancer              | 6              | 0.93 (0.83, 1.06) | 30                 |
| <b>By fat content of dairy</b> |                |                   |                    |
| Low-fat dairy                  | 2              | 1.02 (0.90, 1.15) | 0                  |
| Regular dairy                  | 8              | 0.87 (0.76, 1.00) | 55                 |
| <b>By life stage of dairy</b>  |                |                   |                    |
| 10 ≤ Age(years) ≤ 19           | 6              | 0.90 (0.77, 1.04) | 67                 |
| Age(years) <10                 | 2              | 0.81 (0.46, 1.44) | 0                  |
| <b>By study design</b>         |                |                   |                    |
| Retrospective study            | 4              | 0.87 (0.71, 1.05) | 76                 |
| Prospective study              | 4              | 0.97 (0.79, 1.20) | 7                  |



**Supplementary Table S5. Meta-analyses of dairy intake in early life with any prostate cancer risk**

|                               | No. of studies | RR (95% CI)       | I <sup>2</sup> (%) |
|-------------------------------|----------------|-------------------|--------------------|
| <b>Overall</b>                | 4              | 1.05 (0.86, 1.29) | 23                 |
| <b>By cancer stage</b>        |                |                   |                    |
| Advanced prostate cancer      | 2              | 1.12 (0.57, 2.20) | 41                 |
| Any prostate cancer           | 4              | 1.05 (0.86, 1.29) | 23                 |
| <b>By life stage of dairy</b> |                |                   |                    |
| 12 ≤ Age(years) ≤ 19          | 2              | 1.08 (1.02, 1.15) | 0                  |
| Age(years) <12                | 1              | 0.55 (0.21, 1.43) | NA                 |
| <b>By study design</b>        |                |                   |                    |
| Retrospective study           | 1              | 0.80 (0.44, 1.44) | NA                 |
| Prospective study             | 3              | 1.09 (0.84, 1.40) | 31                 |

**Supplementary Table S6. Meta-analysis of dairy intake in early life with any colorectal cancer risk**

|                | <b>No. of studies</b> | <b>RR (95% CI)</b> | <b>I<sup>2</sup> (%)</b> |
|----------------|-----------------------|--------------------|--------------------------|
| <b>Overall</b> | 3                     | 1.07 (0.59, 1.94)  | 77                       |

**Supplementary Figure S1. Funnel plot for the meta-analysis of milk intake during early life with any breast cancer risk**

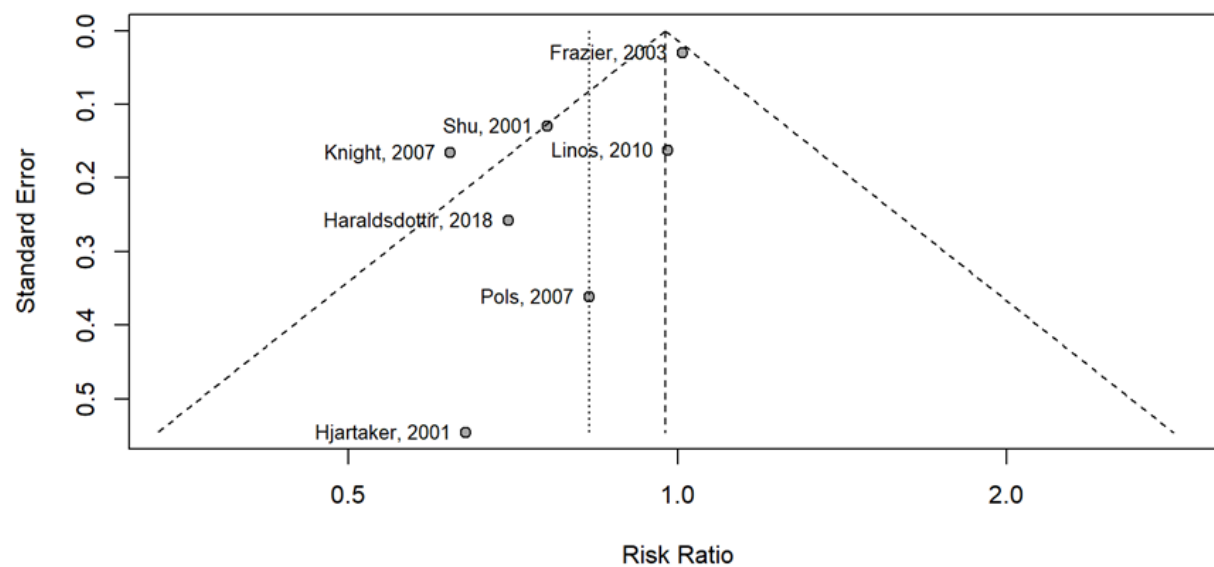

**Supplementary Figure S2. Contour-enhanced funnel plot for the meta-analysis of milk intake during early life with any breast cancer risk, applying the trim-and-fill method**

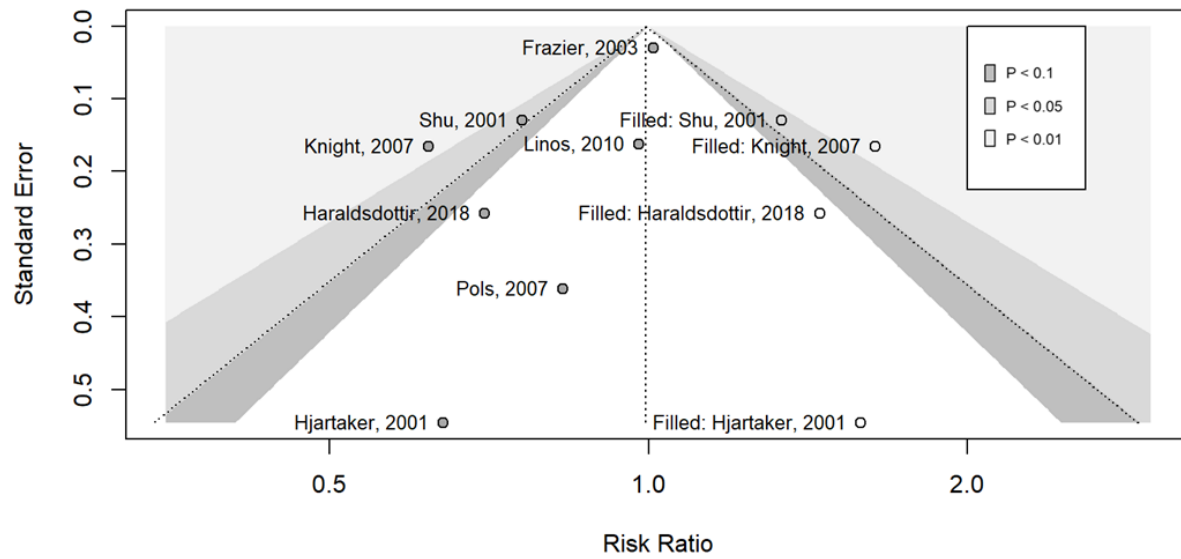

Supplement: s1 [file s1]
